# Supplementary material
Source: HighWire-hosted journal article supplement (doi:10.1101/rna.078929.121)
Supplement: Supplemental_Table_S1_PHAM_calculator.xlsx [file Supplemental_Table_S1_PHAM_calculator.xlsx]

## Sheet: DNA oligo probes PHAM assay
	* Please be mindful to not leave spaces in the oligonucleotide sequence for correct calculation by the excel sheet.
Name	Sequence*(A, T, G or C)	Length	% GC Content	Tm (in 2X SSC)	Ti (in 2X SSC)	Organism
cy-tRNA-TyrGUA ACL	ACCAACCGGTTTACAGCCGGGTGT	24	58.3333	69.299	54.299	S.pombe
cy-tRNA-TyrGUA BP	CCTGAGCCAGAATCGAACTAGCG	23	56.5217	67.3334	52.3334	S.pombe
cy-tRNA-SerAGA ACL	CGCAACAGATTTCTAGTCTGTCCCT	25	48	66.1873	51.1873	S.pombe
cy-tRNA-SerAGA BP	CACCAGCAGGATTTGAACCTGCGC	24	58.3333	69.299	54.299	S.pombe
cy-tRNA-Trp ACL	CTTTGAGATTTGGAATCTCACAC	23	39.1304	60.203	45.203	S.pombe
cy-tRNA-Trp BP	ACCCCTAAGTGACTTGAACAC	21	47.619	60.8883	45.8883	S.pombe
mt-tRNA-Trp ACL	CAATGTCTAATTTGGAATCAGAAGT	25	32	59.6273	44.6273	S.pombe
mt-tRNA-Trp BP	GAGCAGTCCGACTTGAACGAACAAT	25	48	66.1873	51.1873	S.pombe
mt-tRNATyr-GUA-ACL	AAGTCATTGAGTTTACAGCTCAACT	25	36	61.2673	46.2673	S.cerevisiae
cy-tRNATyr-GUA-ACL	GATCTCAAGATTTACAGTCTTGC	23	39.1304	60.203	45.203	S.cerevisiae
mt-tRNATyr-GUA-BP	GGAATAGGAATTGAACCTATGAAG	24	37.5	60.7573	45.7573	S.cerevisiae
cy-tRNATyr-GUA-BP	GGCGAGTCGAACGCCCGAT	19	68.4211	66.0336	51.0336	S.cerevisiae
cy-tRNA-Trp ACL Probe1	CTTTGAGATTTGGAATCTCACAC	23	39.1304	60.203	45.203	S.pombe
cy-tRNA-Trp ACL Probe2	TTGACTTTGAGATTTGGAATCTC	23	34.7826	58.4204	43.4204	S.pombe
cy-tRNA-Tyr RT Primer	AATCGAACTAGCGACCAACC	20	50	60.2573	45.2573	S.pombe

## Sheet: Formula to calculate Ti
	Ti of the DNA probe:	Tm-15°C
	Tm of the probe:	[16.6 log[M] + 0.41[Pgc] + 81.5 − (675/L)]
	M:	Molar salt concentration, to maximum of 0.5 (1xSSC contains 0.165 M Na+)
	Pgc:	Percentage of G+C content,
	L:	length of the probe
